# Supplementary material for: Gene Expression Profiling of Markers of Inflammation, Angiogenesis, Coagulation and Fibrinolysis in Patients with Coronary Artery Disease with Very High Lipoprotein(a) Levels Treated with PCSK9 Inhibitors
Source: MDPI journal article supplement (doi:10.3390/jcdd9070211), 2022-07-01
Supplement: s1 [file s1]

Supplementary Table.

**Supplementary Table S1.** Primer pair sequences used for the gene expression profiling.

| Gene symbol    | Forward primer (5'-3')  | Reverse primer (3'-5')   | Reference |
|----------------|-------------------------|--------------------------|-----------|
| <i>IL1B</i>    | ACGATGCACCTGTACGAT      | AGAACACCACTTGTTGCTCCAT   | [23]      |
| <i>IFNG</i>    | ATTGGAAAGAGGAGAGTGACAGA | CACACTCTTTTGGATGCTCTGG   | [23]      |
| <i>VEGFA</i>   | AGCCTTGCCTTGCTGCTCTACC  | GTGATGATTCTGCCCTCCTCCTTC | [24]      |
| <i>F3</i>      | CAGAGTTCACACCTTACCTGGAG | GTTGTTCTTCTGACTAAAGTCCG  | [26]      |
| <i>SERPINE</i> | CTCATCAGCCACTGGAAAGGCA  | GACTCGTGAAGTCAGCCTGAAAC  | [25]      |
| <i>GAPDH</i>   | TGCACCACCAACTGCTTAGC    | TGGCATGGACTGTGGTCATG     | [23,24]   |
| <i>RPL13A</i>  | AAAAAGCGGATGGTGGTTC     | CTTCCGGTAGTGGATCTTGG     | [22]      |

*IL1B*, interleukin 1 $\beta$  gene; *IFNG*, interferon- $\gamma$  gene; *VEGFA*, vascular endothelial growth factor-A gene; *F3*, tissue factor gene; *SERPINE*, plasminogen activator inhibitor-1 gene; *GAPDH*, glyceraldehyde-3-phosphate dehydrogenase gene; *RPL13A*, ribosomal protein L13a gene.
